# Supplementary material
Source: Springer Nature journal article supplement (https://www.springermedizin.de/resource/supplementary/12885_2011_3194_MOESM13_ESM.pdf/9462996)

**A**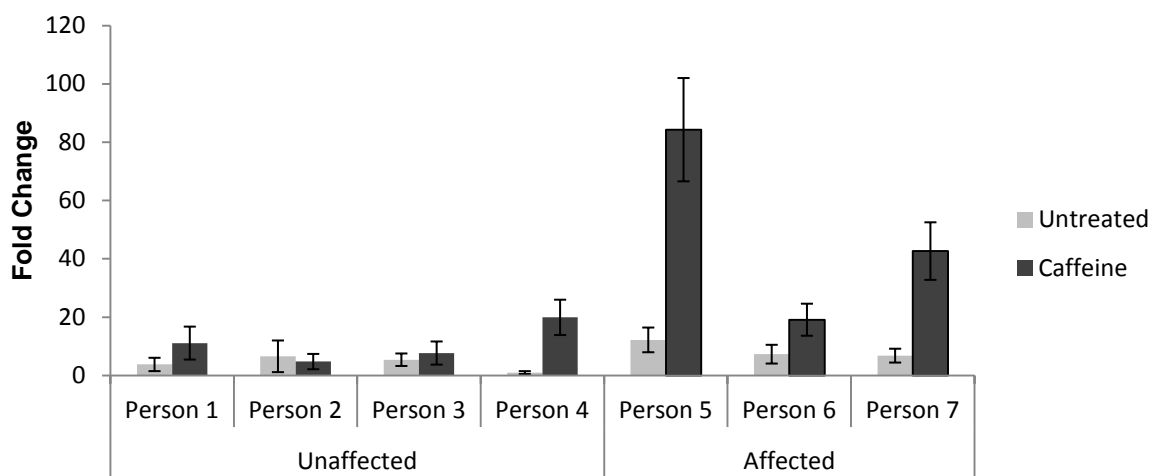**B**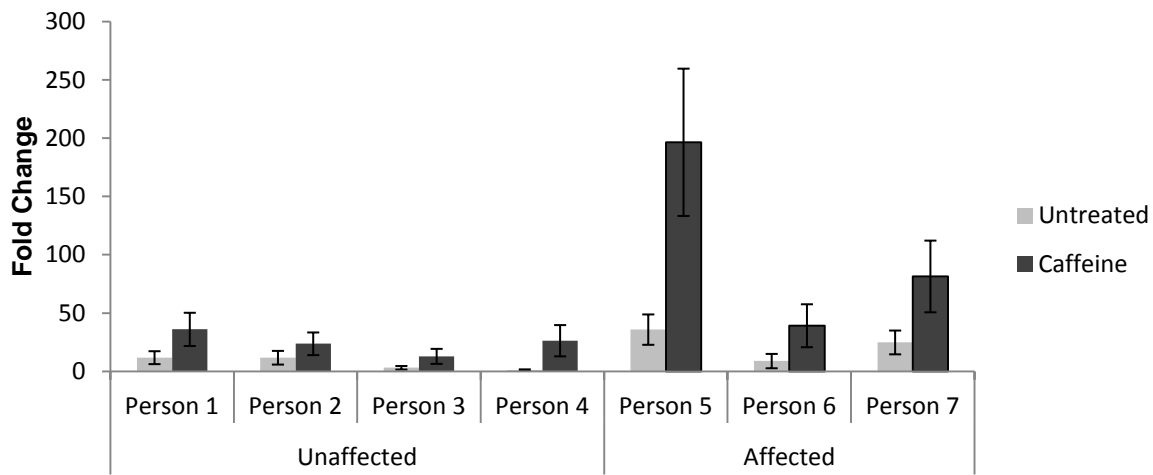**C**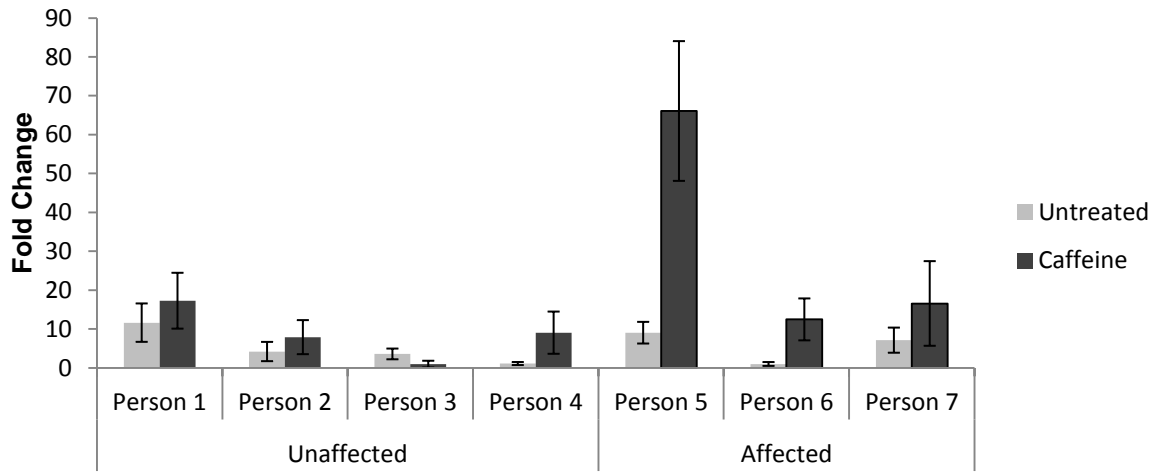

Supplement: MOESM13 [file 9462996]
